# Supplementary material
Source: ML conference proceedings conference paper supplement (https://proceedings.neurips.cc/paper_files/paper/2020/hash/3341f6f048384ec73a7ba2e77d2db48b-Abstract.html)
Supplement: Supplementary file [file 3341f6f048384ec73a7ba2e77d2db48b-Supplemental.pdf]

---

# Supplementary materials of Deep Variational Instance Segmentation

---

Anonymous Author(s)  
Affiliation  
Address  
email

## 1 How many labels can DVISpredict?

2 In the paper section 5.3, we give the average amount of candidates in post-processing and it is much  
3 smaller than RPN[7] based methods[1, 4, 3, 5]. Then an interesting question raised which is how  
4 many distinct objects can our framework predict. With multiple objects in the scene, the network has  
5 to be able to “see” all the objects, in order to assign them different values. Fig. 1 shows the number  
6 of candidate segments inputted to post-processing on the PASCAL VOC and MS-COCO dataset,  
7 which showed that our number of candidates are usually slightly higher than the number of objects.  
8 This showed that DVIS could both detect enough objects for each image, and also did not generate an  
9 overabundance of candidate segments.

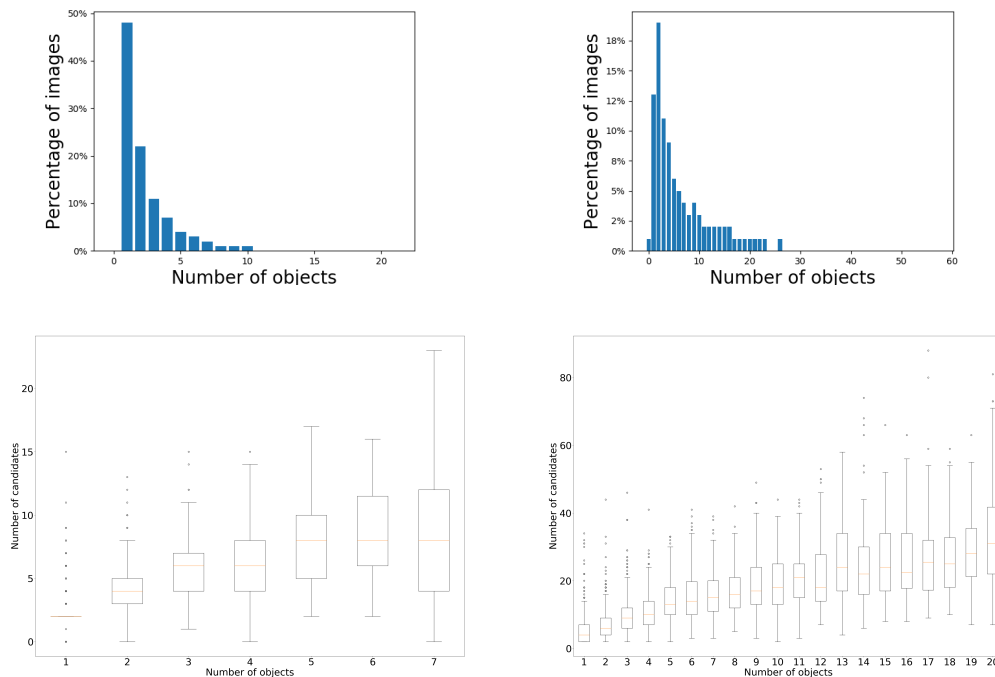

Figure 1: Number of Objects DVIS predicted vs. number of objects in the image on Pascal VOC(the left column) and COCO (the right column). The figures are (from top to bottom): histogram of the number of ground truth objects in the dataset and the number of discretized instances over the number of GT objects. Note that by using 2 set of thresholds we are capable of detecting more objects than the maximal prediction value. And the number of candidate segments is only slightly more than the number of objects in the images

## 10 2 Window size for computing relative loss

11 We show an ablation study to verify that it is indeed necessary in the permutation-invariant loss to  
 12 compare pixel labels with a large spatial displacement. The ablation study is done on the PASCAL  
 13 VOC dataset. We compared results where we limit the permutation-invariant loss to pixel pairs that  
 14 are close-by, with ranges of 8, 16, 32, 64, and 128 pixels tested respectively. Table 1 shows that a  
 15 large window size significantly improves our performance.

Table 1:  $AP^r$  result on PASCAL VOC val. set for different window size taken for the permutation-invariant loss

| Method    | $mAP^r$     |             |             |             |             | $AP^r_{avg}$ |
|-----------|-------------|-------------|-------------|-------------|-------------|--------------|
|           | 0.5         | 0.6         | 0.7         | 0.8         | 0.9         |              |
| range 8   | 63.98       | 57.74       | 50.54       | 36.48       | 14.23       | 44.59        |
| range 16  | 63.38       | 57.55       | 49.72       | 37.49       | 14.09       | 44.45        |
| range 32  | 65.4        | 59.7        | 51.4        | 39.8        | 15.7        | 46.4         |
| range 64  | 68.21       | 62.82       | 56.73       | 49.34       | 33.5        | 54.1         |
| range 128 | <b>70.3</b> | <b>68.0</b> | <b>60.2</b> | <b>50.6</b> | <b>33.7</b> | <b>56.6</b>  |

## 16 3 Regularization and Quantization

17 Since Mumford-Shah regularization term and the quantization term mostly work on improving the  
 18 boundaries, their impact on the interior of the object is relatively small. Unfortunately, the commonly  
 19 used IoU metric is almost exclusively focused on the interior and ignores small differences on the  
 20 boundaries. Hence to illustrate the use of the MS-regularization, we compute the F1-measure, a  
 21 semantic contour-based score from [2], to depict the effect of the Mumford-Shah regularization.

$$\begin{aligned}
 P_i^c &= \frac{1}{C} \sum_{c=1 \sim C} \frac{1}{M} \sum_{k=1 \sim M} [d(z_{i,k}, GT_i^c) < \theta] \\
 R_i^c &= \frac{1}{C} \sum_{c=1 \sim C} \frac{1}{M} \sum_{k=1 \sim M} [d(z_{i,k}, GT_i^c) \geq \theta] \\
 F_1 &= \frac{1}{N} \sum_{i=1 \sim N} \frac{2 \cdot P_i^c \cdot R_i^c}{R_i^c + P_i^c}
 \end{aligned}$$

22 Where  $i, c, m$  indicates the  $m$ -th object in image  $i$  with class  $c$ .  $\theta$  is the distance error tolerance.  
 23 The  $[\cdot]$  is the Iversons bracket notation.  $M$  is the number of objects with class  $c$  in image  $i$ .  $C$  is  
 24 the total number of supported categories.  $N$  is the number of images. From Table 2, the model  
 25 trained with  $\mathcal{L}_{MS}$  is 2% better than the model w/o  $\mathcal{L}_{MS}$  at 1 distance error tolerance, which shows it  
 26 improves significantly performance near the boundary. The model trained with adding quantization  
 27 has equivalent performance with the model without it and it has higher score with larger distance  
 28 error tolerance, since this term can increase margin between different instances and the detected  
 29 instances are better shaped. Fig.2 shows some visual examples, the predicted instance map is more  
 30 smooth, both inside the instances and on the background. Besides, instance boundaries are sharper  
 with  $\mathcal{L}_{MS}$ . And different instances are better separated from each other by adding quantization.

Table 2: semantic contour F1-score on PASCAL VOC val.

| $\theta$                               | 1    | 5    | 10   |
|----------------------------------------|------|------|------|
| w/o $\mathcal{L}_{MS}$                 | 21.6 | 59.1 | 69.6 |
| w/ $\mathcal{L}_{MS}$                  | 23.5 | 59.6 | 69.9 |
| w/ quantization and $\mathcal{L}_{MS}$ | 23.3 | 60.2 | 71.7 |

31

## 32 4 Influence of the IoU head

33 We run an ablation study to identify how the classification confidence  $S_{cls}$  and the predicted IoU  $S_{iou}$   
 34 affect the results. The weighted sum is computed as  $\alpha * S_{iou} + (1 - \alpha) * S_{cls}$  with  $\alpha = [0, 1]$ . Fig.3  
 35 shows that it achieves better mAP at 70% ~ 90% IoU as  $\alpha$  increases, which means the predicted IoU  
 36 can detect more objects in higher quality.

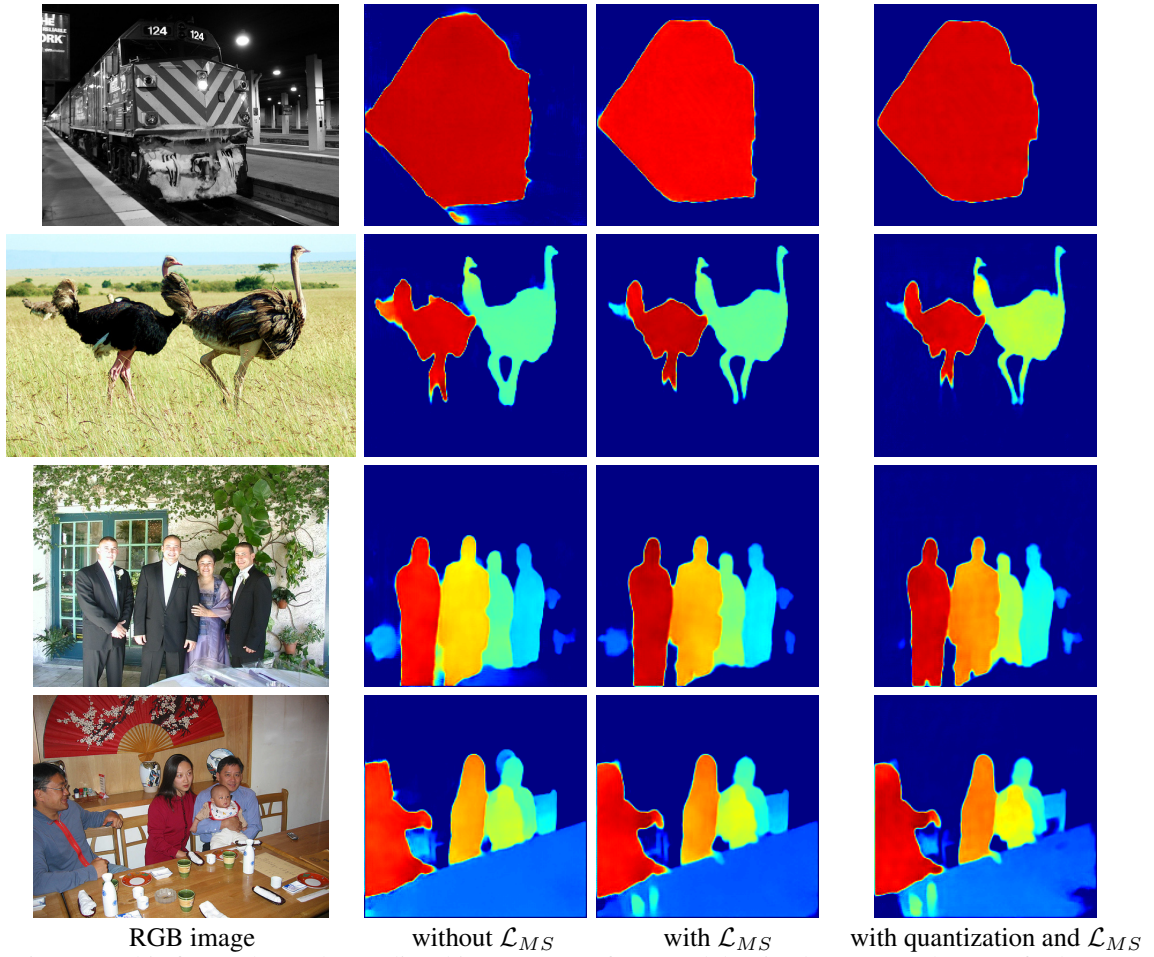

Figure 2: This figure shows the predicted instance map from model trained w/o or w/ the Mumford-Shah regularization, where the previous one is smoother inside the instances and the background and there is less noise along instances' boundaries

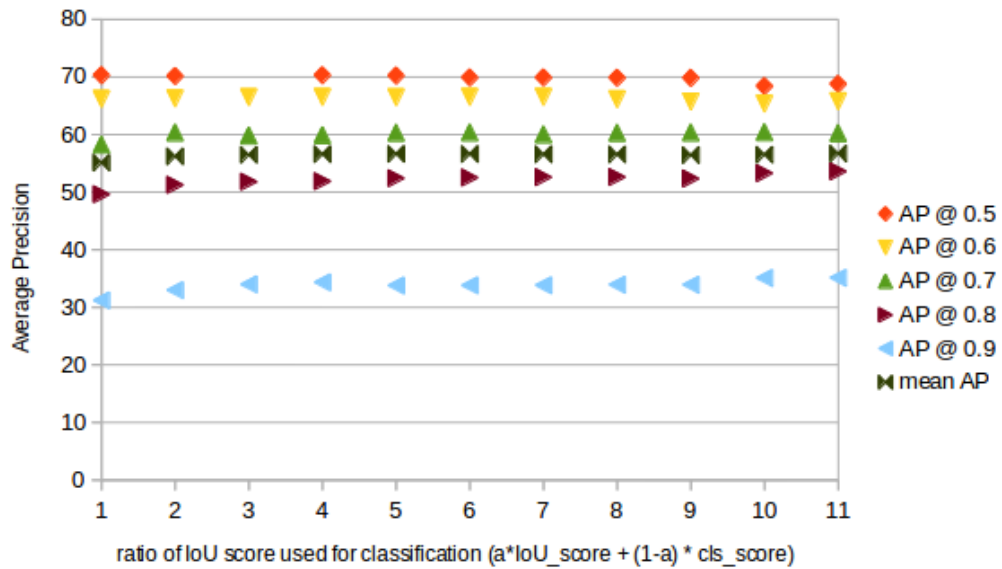

Figure 3: Ablation study on how the IoU score affect the instance segmentation on PASCAL VOC val.

37 **5 Predict instance map on unseen categories**

38 Because our DVIS method learn to segment instances directly from instance-level ground truth, it can  
39 recognize 'objectness' for unseen categories by relating them to seen ones. We test it with running the  
40 model trained on PASCAL VOC *train set* on images containing unseen categories from the DAVIS  
41 challenge [6]. Examples are shown in Fig.4, which shows DVIS can recognize 'objectness' and  
segment the instances.

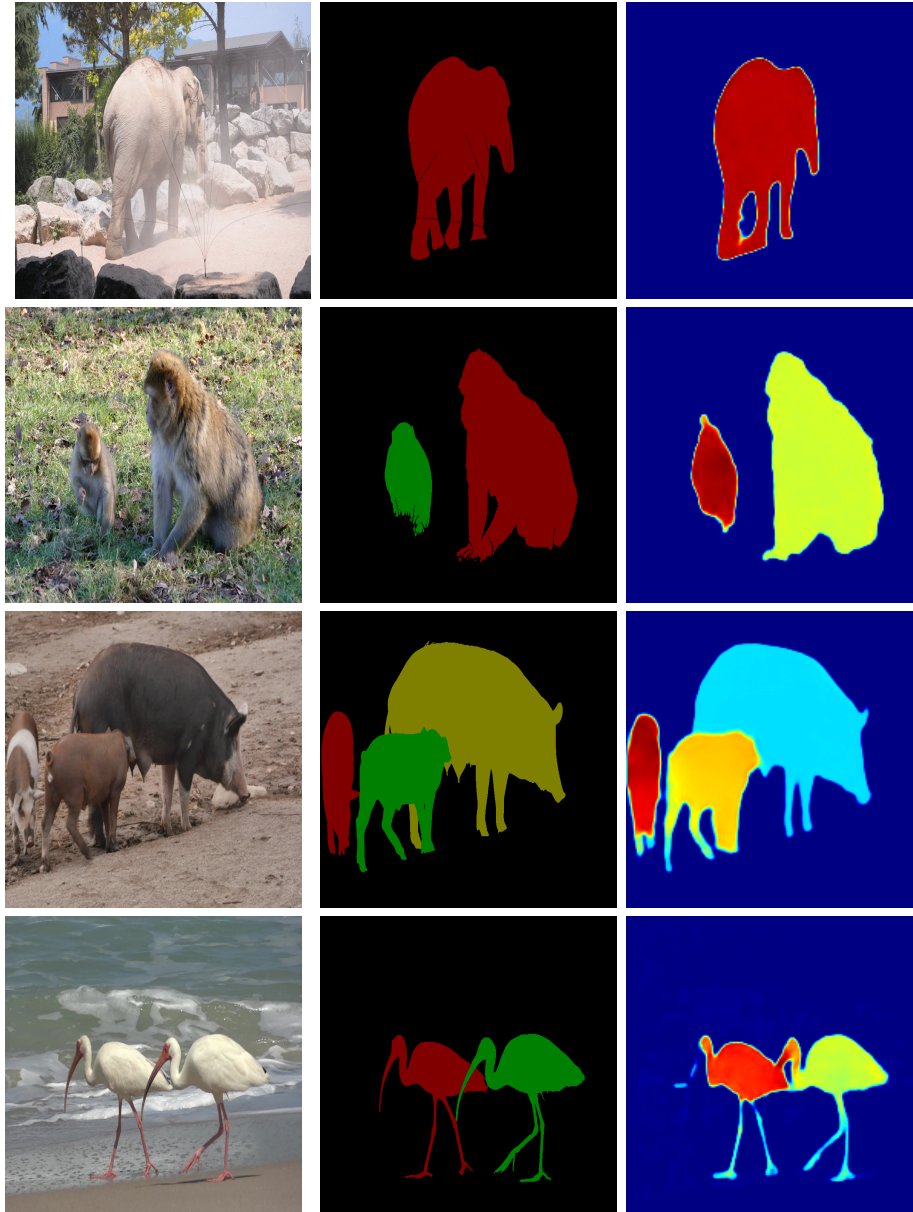

RGB image GT predicted instance map  
Figure 4: Predicted instance map on unseen categories from DAVIS challenge [6].

42

43 **6 Qualitative Results on PASCAL VOC**

44 We show some more qualitative results on the PASCAL VOC dataset in Fig.5.

45 **7 Qualitative Results on COCO**

46 We show some more qualitative results on the MS-COCO dataset in Fig.6 and Fig. 7. We also show  
 47 some failure cases in Fig.8. In those failure cases, our method fails to predict a good instance map  
 48 when the scene become too crowded.

49 Note that part of the reason the algorithm is failing on those crowded scenes may be because of  
 50 the way COCO is labeled. As can be seen in 8, among all the persons in the scene, only some  
 51 are labeled as persons while some are not. We hypothesize this confuses our algorithm more than  
 52 the anchor-based algorithms, since our permutation-invariant loss looks globally at all pixel pairs,  
 53 whereas anchor box based methods only analyzes locally within each box. It would be interesting if  
 54 we run the algorithm on a dataset where instances are more consistently labeled.

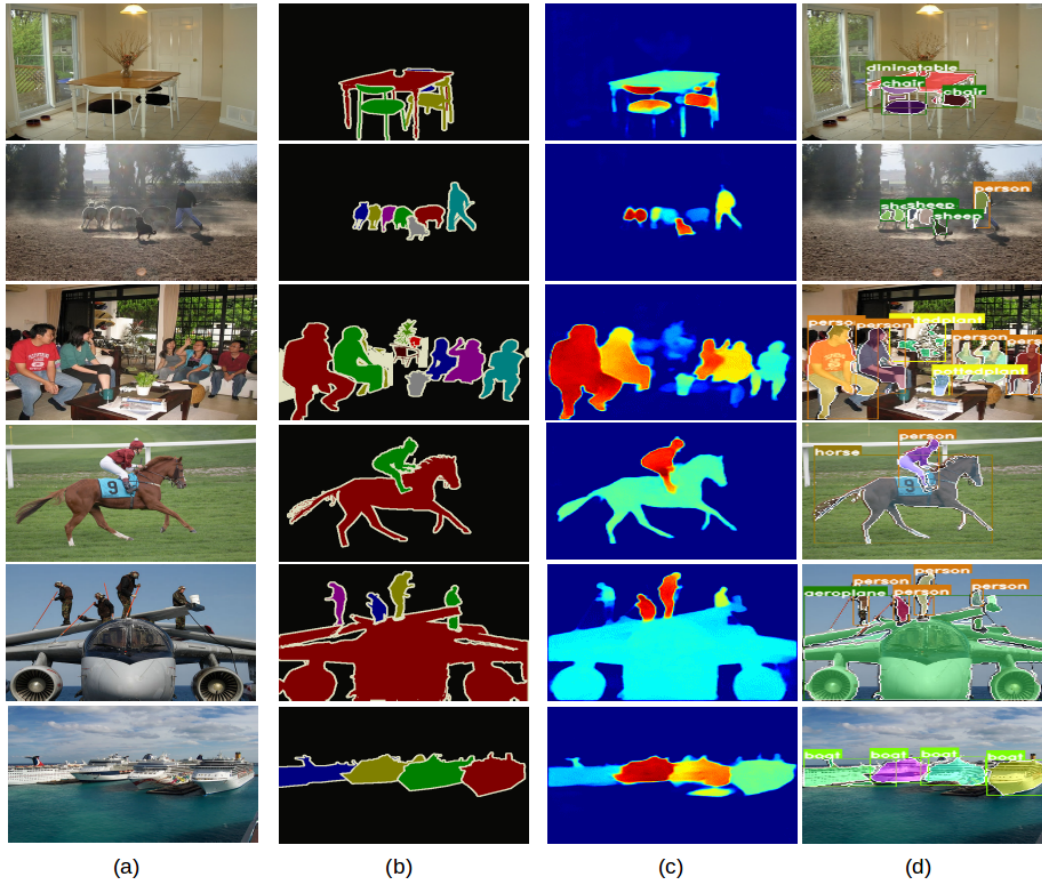

Figure 5: Examples from Pascal VOC 2012 *val* subset. From left to right: Image, Ground Truth, Predicted Instance Map, Final Instance Segmentation from DVIS(best viewed in color)

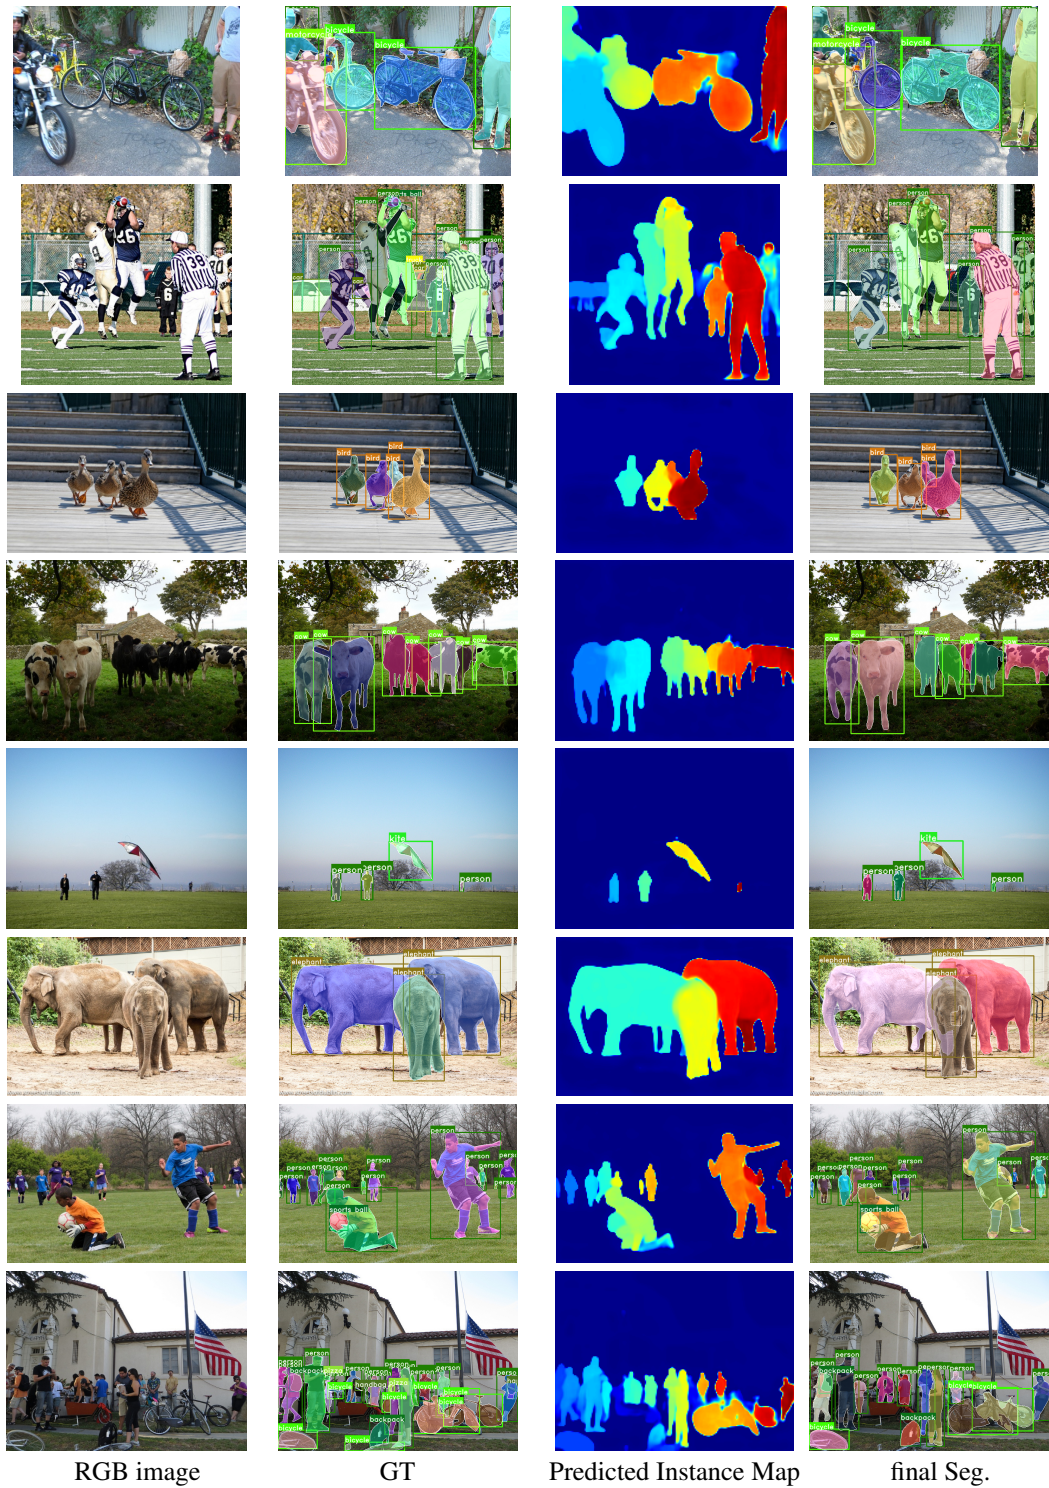

Figure 6: This figure shows qualitative results on COCO val2017 set, part(1)

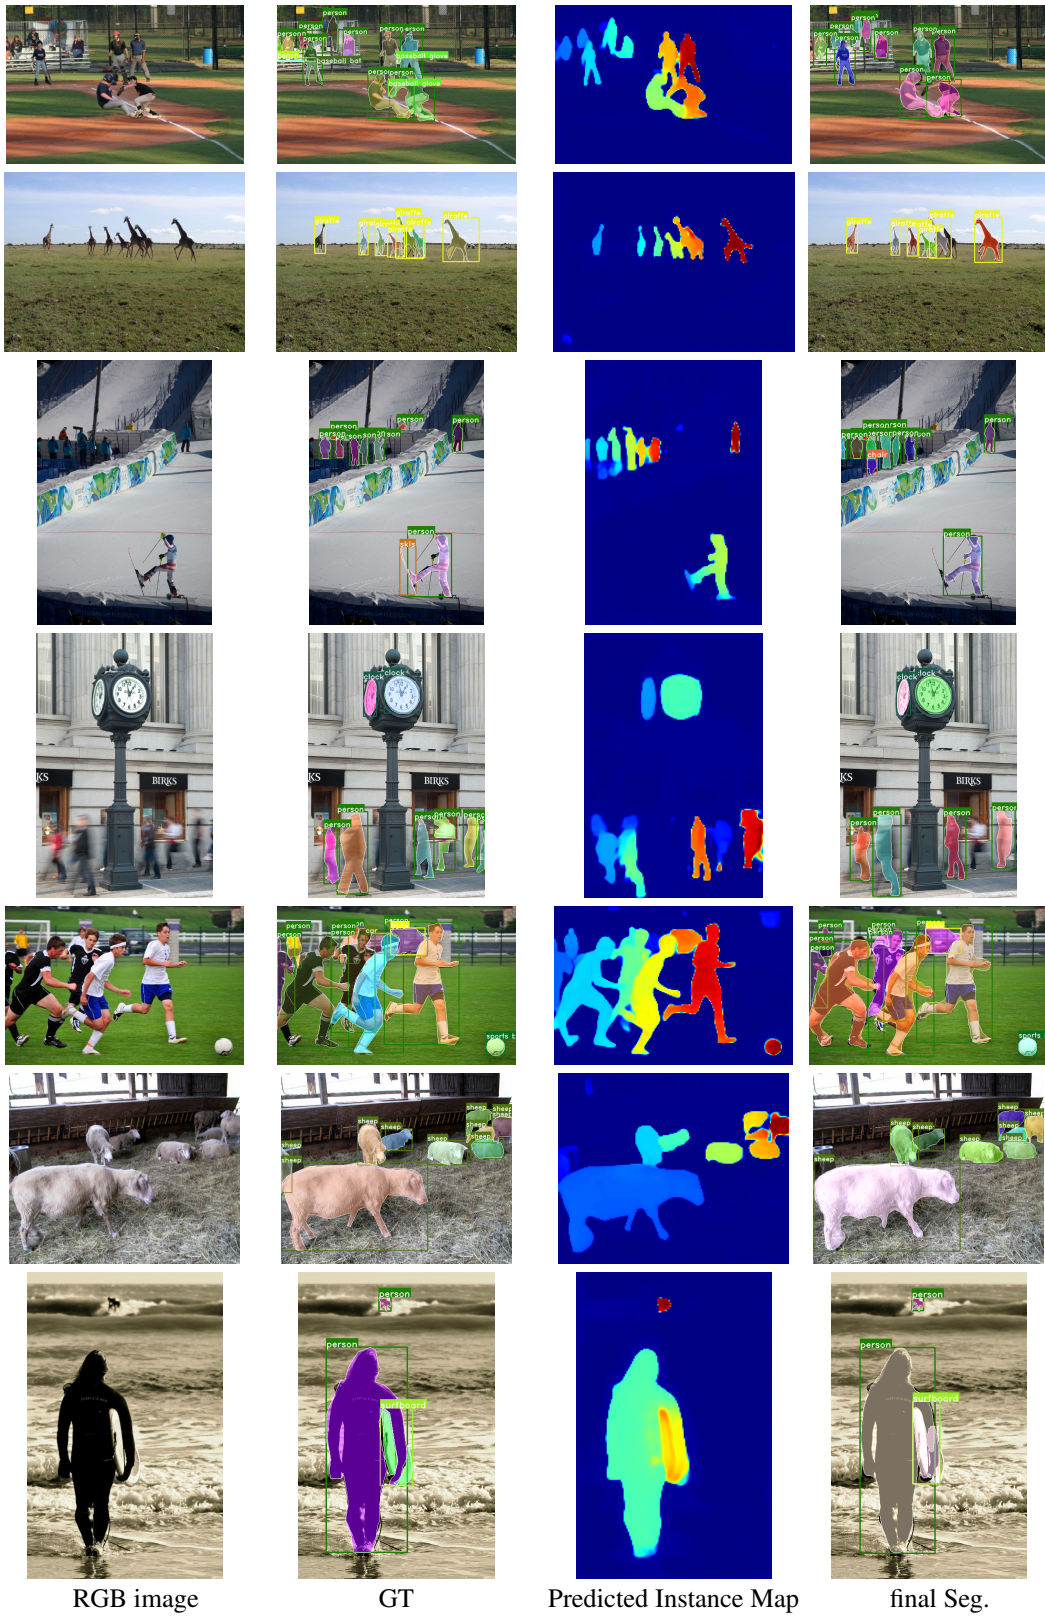

Figure 7: This figure shows qualitative results on COCO val2017 set, part (2)

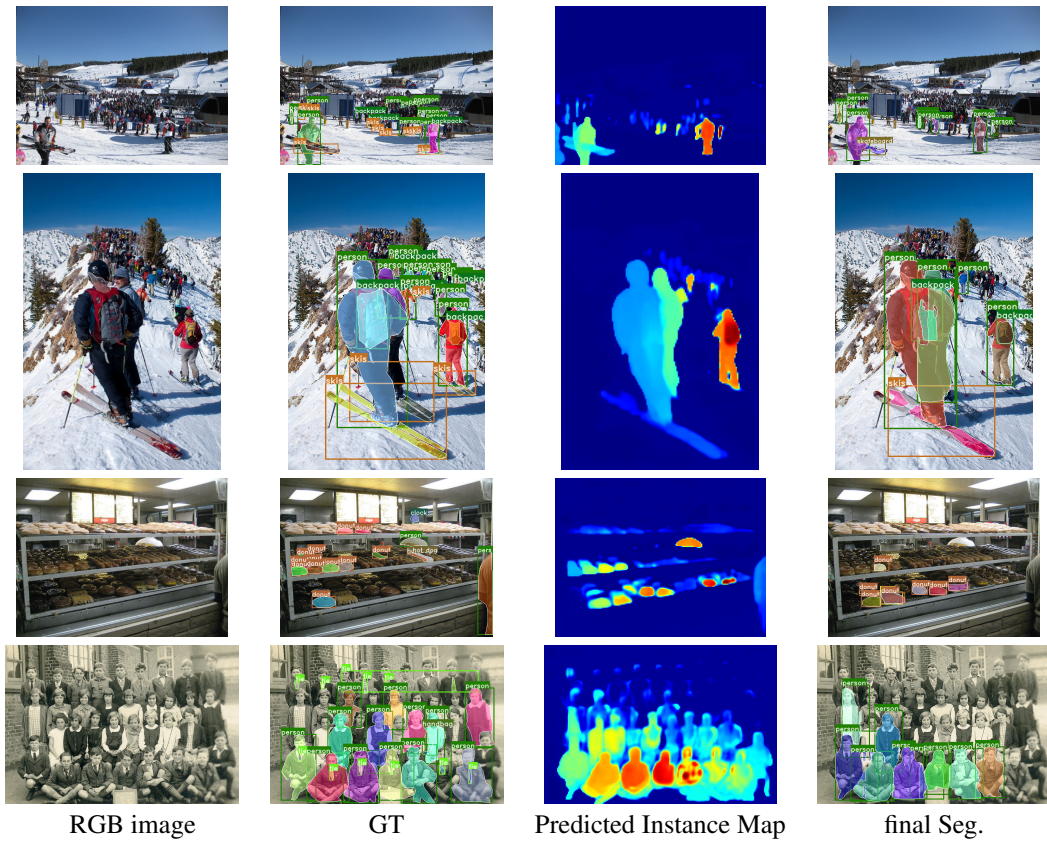

Figure 8: Examples of inaccurate predicted instance maps with crowded objects on the COCO *val2017* set



55 **References**

- 56 [1] Bolya, D., Zhou, C., Xiao, F., Lee, Y.J.: Yolact: real-time instance segmentation. In: Proceedings  
57 of the IEEE International Conference on Computer Vision. pp. 9157–9166 (2019)
- 58 [2] Csurka, G., Larlus, D., Perronnin, F., Meylan, F.: What is a good evaluation measure for semantic  
59 segmentation?. In: BMVC. vol. 27, p. 2013 (2013)
- 60 [3] He, K., Gkioxari, G., Dollár, P., Girshick, R.: Mask r-cnn. arXiv preprint arXiv:1703.06870  
61 (2017)
- 62 [4] Li, Y., Qi, H., Dai, J., Ji, X., Wei, Y.: Fully convolutional instance-aware semantic segmentation.  
63 arXiv preprint arXiv:1611.07709 (2016)
- 64 [5] Liu, S., Qi, L., Qin, H., Shi, J., Jia, J.: Path aggregation network for instance segmentation.  
65 In: Proceedings of the IEEE Conference on Computer Vision and Pattern Recognition. pp.  
66 8759–8768 (2018)
- 67 [6] Pont-Tuset, J., Perazzi, F., Caelles, S., Arbeláez, P., Sorkine-Hornung, A., Van Gool, L.: The  
68 2017 davis challenge on video object segmentation. arXiv:1704.00675 (2017)
- 69 [7] Ren, S., He, K., Girshick, R., Sun, J.: Faster r-cnn: Towards real-time object detection with  
70 region proposal networks. In: Advances in neural information processing systems. pp. 91–99  
71 (2015)
